# Supplementary material for: Unfolded Protein Response Is Activated by Aurora Kinase A in Esophageal Adenocarcinoma
Source: MDPI journal article supplement (doi:10.3390/cancers14061401), 2022-03-09
Supplement: s1 [file s1]

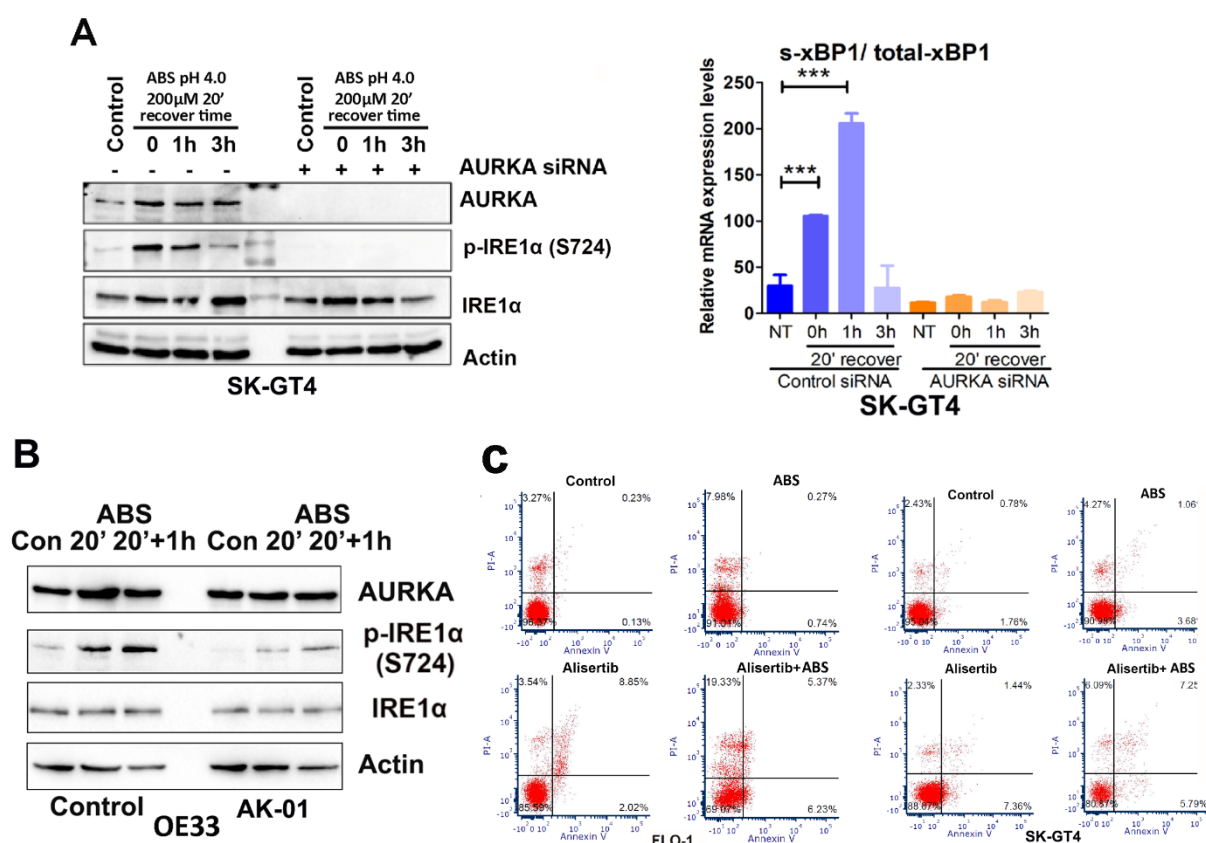

## Supplementary Figure 1

**Figure S1. AURKA promotes ABS induced IRE1α phosphorylation.** A) Left panel: Western blot analysis of AURKA, p-IRE1α (S724), IRE1α, and β-actin protein expression in control siRNA or AURKA siRNA transfected FLO-1 cells with control or ABS (pH4.0, 200μM, 20') exposure followed by recovery at indicated time courses (0, 1h or 3h). Right panel: qRT-PCR analysis of the ratio of spliced-xBP1 (s-xBP1)/ total-xBP1 in the same cells as A left panel. B) Western blot analysis of AURKA, p-IRE1α (S724), IRE1α, and β-actin protein expression in OE33 cells with or without AK-01 (200nM, 48h), followed by ABS (pH4.0, 200μM, 20') exposure with indicated time courses of recovery (0, 1h). C) Left panel: Flow cytometry analysis of Annexin V and PI staining in FLO-1 cells with ABS (pH4.0, 200μM, 20') exposure followed by 3h recovery, at 72 hours after control siRNA or AURKA siRNA transfection. Right panel: similar results in SK-GT4 cells as the left panel \*\*\*  $p < 0.001$ .

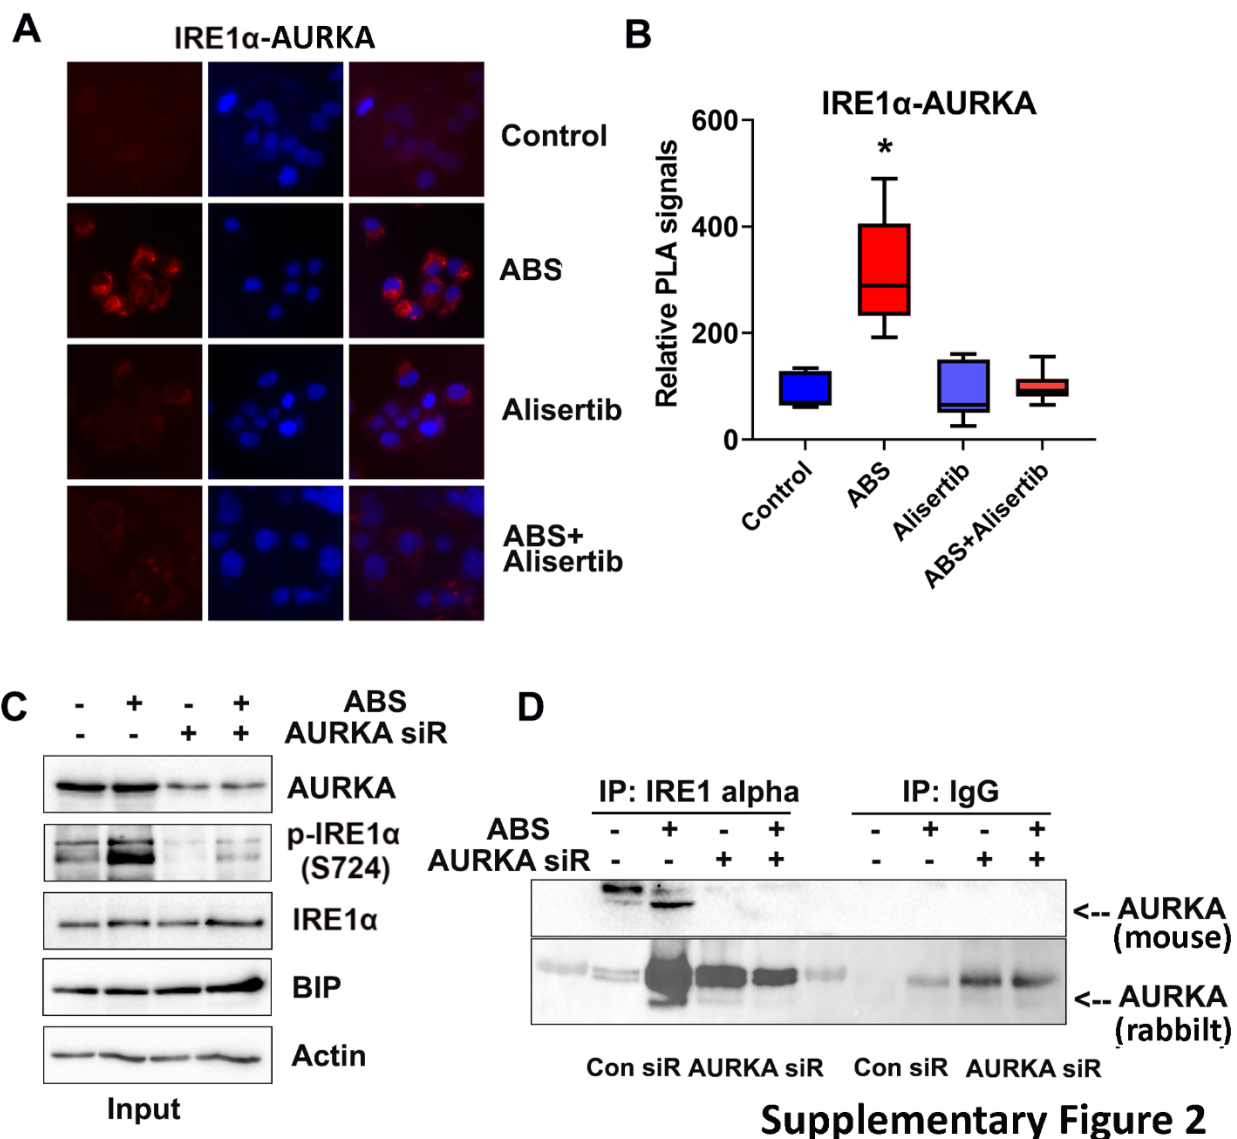

**Figure S2. AURKA is co-localized and bond to IRE1 $\alpha$ .** A) *In situ* proximity ligation assay (PLA) Immunofluorescence staining in FLO-1 control or alisertib 200nM 48h treated cells with or without ABS (pH4.0, 200 $\mu$ M, 20') exposure at the last 20' before cell harvest. The red signal indicates the positive PLA signal. B) Quantification of A using ImageJ software. C) Western blot analysis of AURKA, p-IRE1 $\alpha$  (S724), IRE1 $\alpha$ , BIP, and  $\beta$ -actin protein expression in IRE1 $\alpha$  IP input samples of FLO1 cells. Cells were transfected by control or AURKA siRNA for 72h with or without ABS (pH4.0, 200 $\mu$ M, 20') exposure at the last 20' before cell harvest. D) Western blot analysis of AURKA in IRE1 $\alpha$  IP or IgG IP samples from C. \*P<0.05.

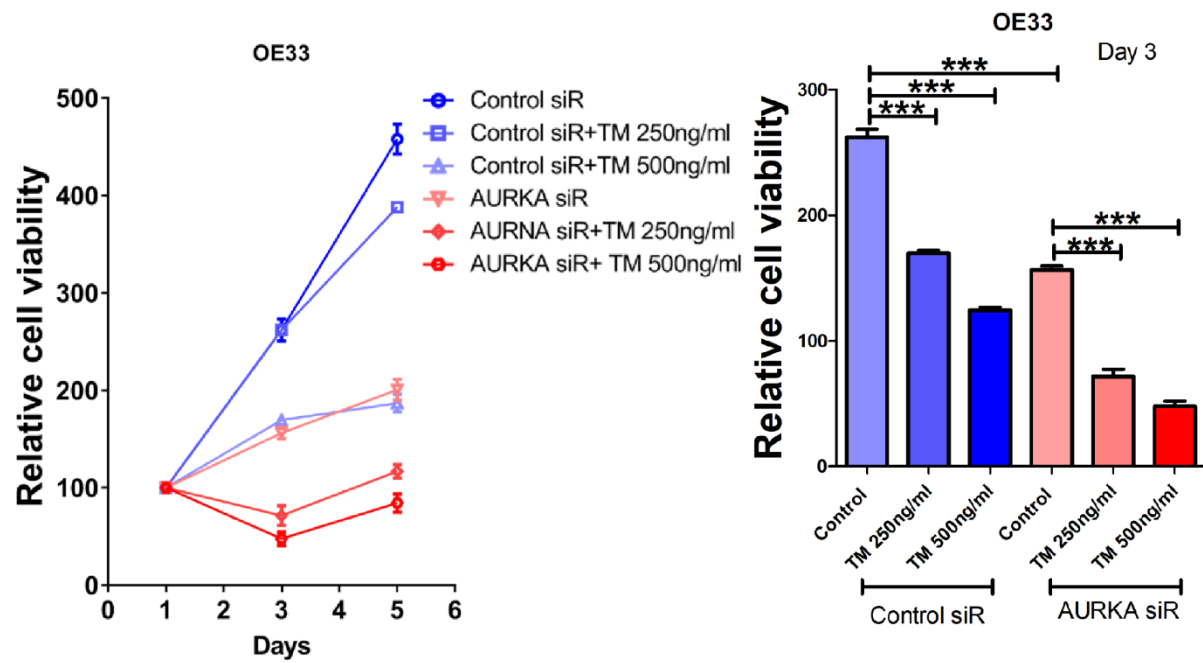

## Supplementary Figure 3

**Figure S3. AURKA siRNA knockdown promotes EAC cells to Tunicamycin treatment.** Left panel: ATP-Glo analysis of control siRNA or AURKA siRNA transfected OE33 cells with Tunicamycin (TM) 250 ng/ml or 500 ng/ml for three days or five days. Right panel: Cell viability analysis of day 3 TM treatment from left panel, \*\*\*  $p < 0.001$ .

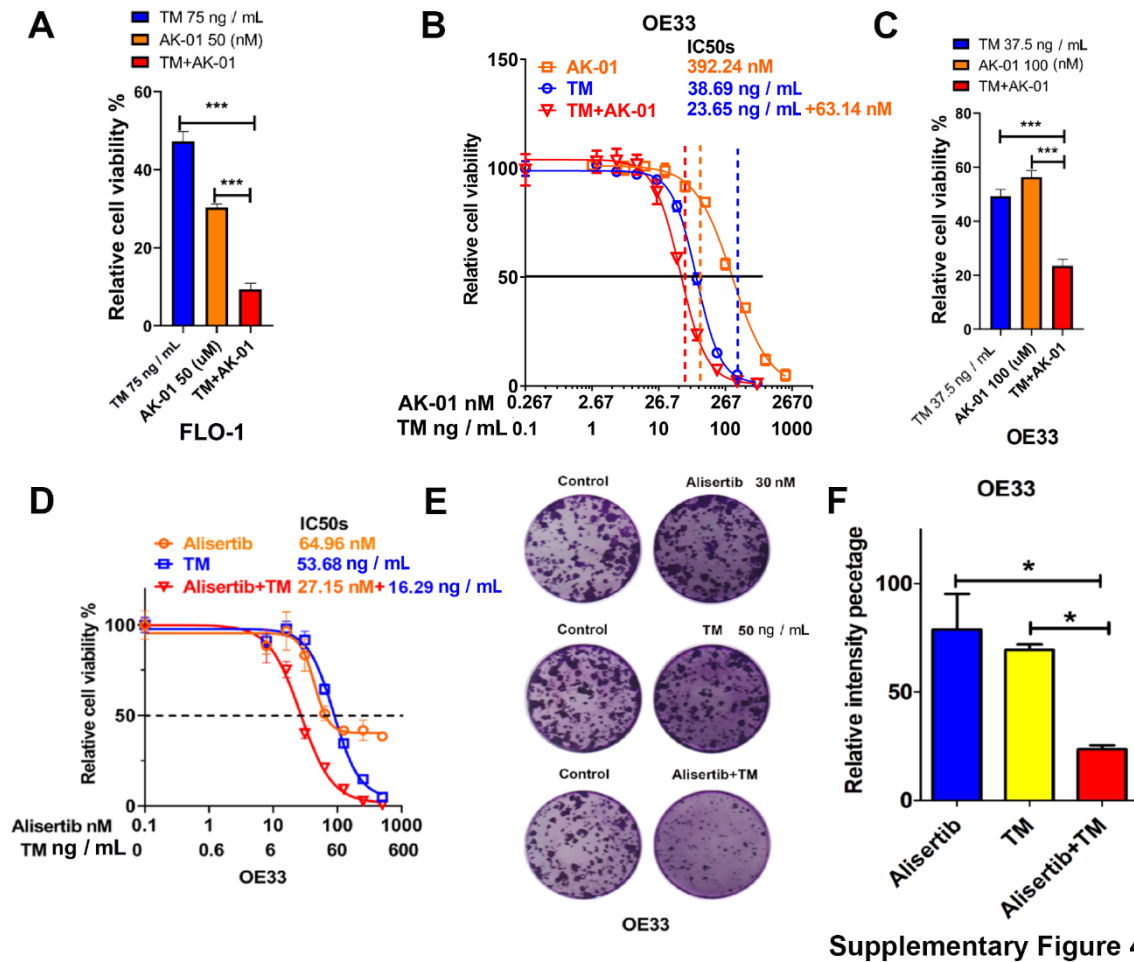

Supplementary Figure 4

**Figure S4. AURKA inhibition synergizes with Tunicamycin in EAC cells.** A) Cell viability of TM (75 ng/ml) or AK-01 (50 nM) showed the most significantly synergistic effect of the combination treatment in Figure 6B. B) ATP-Glo analysis of FLO-1 cells treated with Tunicamycin, AURKA inhibitor AK-01, or combination for five days. C) Cell viability of one selected drug concentration showed the most significantly synergistic effect of the combination treatment in B. D) Similar results as in Figure 6C in OE33 cells. E) Representative wells of clonogenic cell survival assay in FLO-1 and OE33 cells treated with Tunicamycin, AURKA inhibitor Alisertib, or the combination. F) Quantification of E, \* $P < 0.05$ , \*\*\*  $p < 0.001$ .

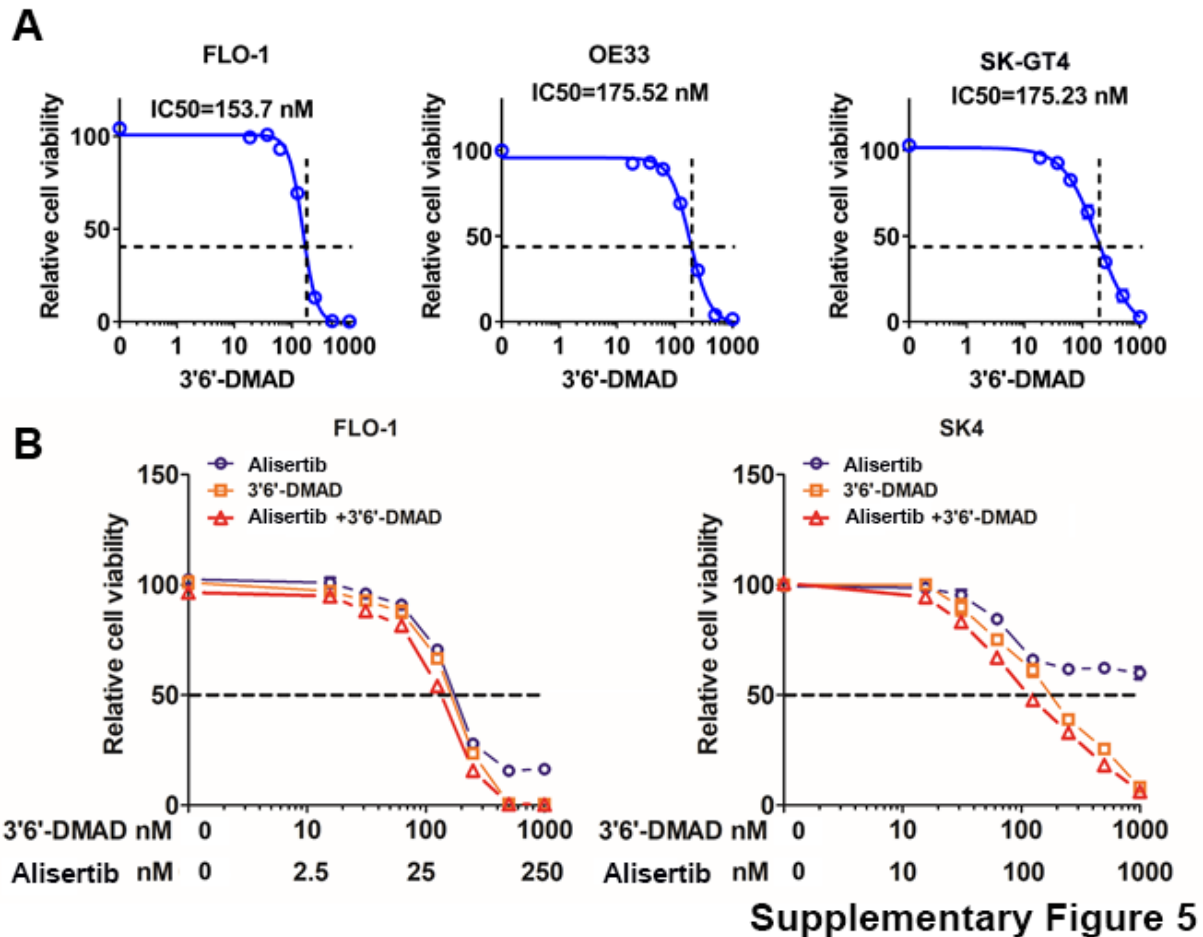

**Figure S5. AURKA inhibition shows no synergistic effect with IRE1 $\alpha$  inhibitor.** A) ATP-Glo analysis of FLO-1, OE33, and SK-GT4 cells treated with IRE1 $\alpha$  inhibitor 3'6'-DMAD. B) ATP-Glo analysis of FLO-1 and SK-GT4 cells treated with 3'6'-DMAD, Alisertib, or the combination.

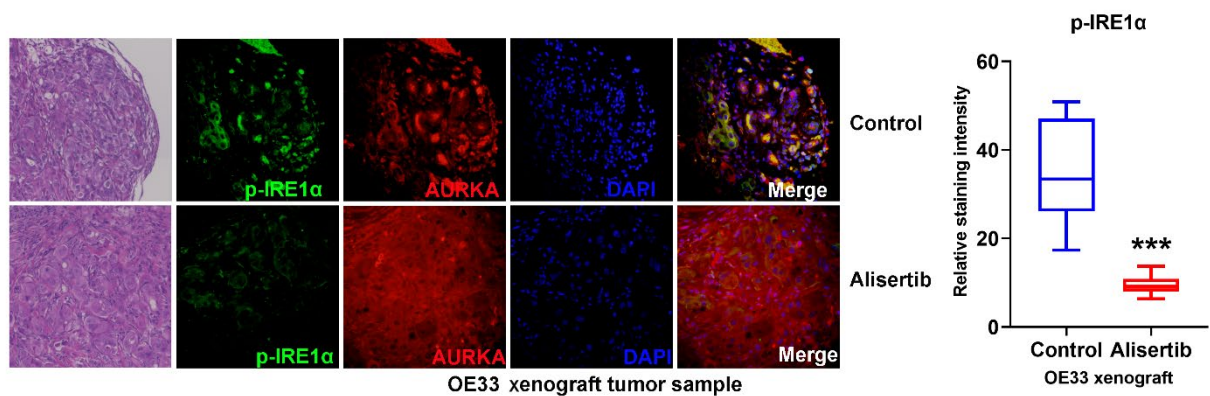

**Figure S6. P-IRE1 $\alpha$  and AURKA protein are co-localized in FLO-1 xenograft tumor samples.** Left panel: H&E staining (left panels) and IF staining of p-IRE1 $\alpha$  (S724, green signal), AURKA (red signal) in FLO-1 xenograft tumor samples with or without alisertib treatment. 200x magnification. Right panel: Quantification of p-IRE1 $\alpha$  staining in the left panel using ImageJ.

## Supplementary tables

Table S1. Age, sex, and histology information of human esophageal tissue samples.

| Sample ID | Sex     | Age     | Site | Pathology | Sample ID | Sex     | Age     | Site | Pathology |
|-----------|---------|---------|------|-----------|-----------|---------|---------|------|-----------|
| 1         | M       | 68      | GEJ  | ADENO     | 33        | M       | 61      | ESO  | NORMAL    |
| 2         | M       | 71      | ESO  | ADENO     | 34        | M       | 65      | ESO  | NORMAL    |
| 3         | F       | 50      | GEJ  | ADENO     | 35        | F       | 65      | ESO  | NORMAL    |
| 4         | M       | 66      | GEJ  | ADENO     | 36        | M       | 56      | ESO  | NORMAL    |
| 5         | M       | 77      | ESO  | ADENO     | 37        | missing | missing | ESO  | NORMAL    |
| 6         | M       | 56      | GEJ  | ADENO     | 38        | F       | 66      | ESO  | NORMAL    |
| 7         | M       | 72      | GEJ  | ADENO     | 39        | M       | 53      | ESO  | NORMAL    |
| 8         | M       | 73      | ESO  | ADENO     | 40        | M       | 60      | ESO  | NORMAL    |
| 9         | M       | 66      | GEJ  | ADENO     | 41        | M       | 59      | ESO  | NORMAL    |
| 10        | M       | 62      | ESO  | ADENO     | 42        | F       | 57      | ESO  | NORMAL    |
| 11        | missing | missing | ESO  | ADENO     | 43        | M       | 52      | ESO  | NORMAL    |
| 12        | F       | 51      | ESO  | ADENO     | 44        | M       | 58      | ESO  | NORMAL    |
| 13        | M       | 71      | ESO  | ADENO     | 45        | M       | 44      | ESO  | NORMAL    |
| 14        | M       | 61      | ESO  | ADENO     | 46        | M       | 73      | ESO  | NORMAL    |
| 15        | missing | 51      | ESO  | SCQ       | 47        | F       | 45      | ESO  | NORMAL    |
| 16        | missing | 65      | GEJ  | ADENO     | 48        | missing | 53      | ESO  | NORMAL    |
| 17        | M       | 61      | ESO  | SCQ       | 49        | missing | 69      | ESO  | NORMAL    |
| 18        | M       | 65      | GEJ  | ADENO     | 50        | missing | 66      | ESO  | NORMAL    |
| 19        | F       | 65      | ESO  | ADENO     | 51        | F       | 61      | ESO  | NORMAL    |
| 20        | M       | 56      | ESO  | SCQ       | 52        | M       | 62      | ESO  | NORMAL    |
| 21        | F       | missing | ESO  | ADENO     | 53        | M       | 56      | ESO  | NORMAL    |
| 22        | F       | 66      | ESO  | ADENO     | 54        | F       | 40      | ESO  | NORMAL    |
| 23        | M       | 53      | ESO  | SCQ       | 55        | F       | 79      | ESO  | NORMAL    |
| 24        | M       | 60      | ESO  | ADENO     | 56        | M       | 53      | ESO  | NORMAL    |
| 25        | M       | 59      | ESO  | SCQ       | 57        | F       | 55      | ESO  | NORMAL    |
| 26        | F       | 57      | ESO  | SCQ       | 58        | M       | 77      | ESO  | NORMAL    |
| 27        | M       | 52      | GEJ  | ADENO     | 59        | M       | 66      | ESO  | NORMAL    |
| 28        | M       | 58      | ESO  | SCQ       | 60        | M       | 69      | ESO  | NORMAL    |
| 29        | M       | 44      | ESO  | SCQ       | 61        | F       | 46      | ESO  | NORMAL    |
| 30        | M       | 58      | GEJ  | ADENO     | 62        | M       | 68      | ESO  | NORMAL    |
| 31        | M       | 79      | GEJ  | ADENO     |           |         |         |      |           |
| 32        | F       | 68      | GEJ  | ADENO     |           |         |         |      |           |

ESO: esophagus, GEJ: esophagogastric junction, ADENO: adenocarcinoma, SCQ: Squamous Cell Carcinoma.

Table S2. Primers for q-RT-PCR.

| Gene          | Forward               | Reverse                |
|---------------|-----------------------|------------------------|
| AURKA         | GAGGTCCAAAACGTGTTCTCG | ACAGGATGAGGTACACTGGTTG |
| BIP           | CATCACGCCGTCCTATGTCG  | CGTCAAAGACCGTGTCTCG    |
| s-XBP1        | CTGAGTCCGAATCAGGTGCAG | ATCCATGGGGAGATGTTCTGG  |
| T-XBP1        | TGGCCGGGTCTGCTGAGTCCG | ATCCATGGGGAGATGTTCTGG  |
| IRE1 $\alpha$ | CACAGTGACGCTTCTGAAAC  | GCCATCATTAGGATCTGGGAGA |

## Abbreviations

EAC: esophageal adenocarcinoma  
NE: normal esophagus  
AURKA: Aurora kinase A  
UPR: Unfolded protein response  
ER: endoplasmic reticulum  
TCGA: The Cancer Genome Atlas  
GEO: Gene Expression Omnibus  
qRT-PCR: Real-Time Quantitative Reverse Transcription  
IF: immunofluorescence  
IP: immunoprecipitation  
IHC: immunohistochemistry  
PLA: proximity ligation assays

BiP: binding immunoglobulin protein  
BE: Barrett's esophagus  
ABS: acidic bile salts  
GERD: Gastroesophageal reflux disease  
IRE1 $\alpha$ : serine/threonine-protein kinase/endoribonuclease inositol-requiring enzyme

1  $\alpha$

p-IRE1 $\alpha$ : phosphor-IRE1 $\alpha$   
PERK: PKR-like ER kinase  
ATF6: activating transcription factor 6  
CHTN: National Cancer Institute Cooperative Human Tissue Network  
BSA: bovine serum albumin  
GSEA: Gene Set Enrichment Analysis  
DCA: deoxycholic acid  
NGS: Next Generation Sequencing  
TM: Tunicamycin  
HGD: high-grade dysplasia  
c-PARP: cleaved-PARP  
s-xBP1: spliced-xBP1
